# Supplementary material for: Simultaneous determination of perfluoroalkyl substances and bile acids in human serum using ultra-high-performance liquid chromatography–tandem mass spectrometry
Source: Springer Nature journal article supplement (doi:10.1007/s00216-019-02263-6), 2019-11-23

## **Analytical and Bioanalytical Chemistry**

### **Electronic Supplementary Material**

#### **Simultaneous determination of perfluoroalkyl substances and bile acids in human serum using ultra-high-performance liquid chromatography-tandem mass spectrometry**

Samira Salihović, Alex M. Dickens, Ida Schoultz, Frida Fart, Lisanna Sinisalu, Tuomas Lindeman, Jonas Halfvarson, Matej Orešič, Tuulia Hyötyläinen

**Table S1** Demographic characteristics of the study population (n=20)

| <b>Parameter</b>   | <b>Median (range)</b> |
|--------------------|-----------------------|
| <b>Age (years)</b> | 58.5 (55-69)          |
| <b>Sex</b>         | 13/7(Male/Female)     |

**Table S2** Acquisition parameters including the list of target compounds ordered by retention time

|    | Target analytes             | Abbreviation | Retention time | Precursor Ion (m/z) | Product Ion (m/z) |       |       |
|----|-----------------------------|--------------|----------------|---------------------|-------------------|-------|-------|
|    |                             |              |                |                     | 1                 | 2     | 3     |
| 1  | Glycodehydrocholic acid     | GDHCA        | 2.97           | 458.1               | 74.0              | 348.1 | 380.0 |
| 2  | Taurodehydrocholic acid     | TDHCA        | 3.09           | 508.1               | 80.0              | 106.9 | 124.0 |
| 3  | Perfluoropentanoic acid     | PFPeA        | 3.70           | 262.7               | 68.9              | 219.0 | —     |
| 4  | Dihydroxycholestanic acid   | DHCA         | 4.45           | 401.1               | 215.0             | 249.0 | 331.0 |
| 5  | Perfluorobutane sulfonate   | PFBS         | 4.53           | 298.9               | 80.0              | 98.9  | —     |
| 6  | Tauro-omega-muricholic acid | TwMCA        | 5.38           | 514.2               | 80.0              | 106.9 | 123.0 |
| 7  | Perfluorohexanoic acid      | PFHxA        | 5.82           | 312.8               | 68.9              | 119.0 | 269.0 |
| 8  | Tauro-alpha-muricholic acid | TaMCA        | 5.81           | 514.2               | 80.0              | 106.9 | 123.0 |
| 9  | Tauro-beta-muricholic acid  | TbMCA        | 5.87           | 514.2               | 80.0              | 106.9 | 123.0 |
| 10 | Glycohyocholic acid         | GHCA         | 6.88           | 464.2               | 74.0              | —     | —     |
| 11 | Trihydroxycholestanic acid  | THCA         | 6.92           | 514.2               | 80.0              | 106.9 | 123.0 |
| 12 | Glycoursodeoxycholic acid   | GUDCA        | 7.10           | 448.2               | 74.0              | —     | —     |
| 13 | Tauroursodeoxycholic acid   | TUDCA        | 7.11           | 498.2               | 80.0              | 106.9 | 123.0 |
| 14 | Glycohyodeoxycholic acid    | GHDCA        | 7.39           | 448.2               | 74.0              | —     | —     |
| 15 | Taurohyodeoxycholic acid    | THDCA        | 7.40           | 498.2               | 80.0              | 106.9 | 123.0 |
| 16 | Perfluoroheptanoic acid     | PFHpA        | 7.53           | 363.0               | 169.0             | 319.0 | —     |
| 17 | 7-oxo-deoxycholic acid      | 7-oxo-DCA    | 7.61           | 405.2               | 123.0             | —     | —     |
| 18 | Taurocholic acid            | TCA          | 7.82           | 514.2               | 80.0              | 106.9 | 123.0 |
| 19 | Glycocholic acid            | GCA          | 7.84           | 464.2               | 74.0              | —     | —     |
| 20 | 7-oxo-hyocholic acid        | 7-oxo-HCA    | 7.88           | 405.2               | 375.3             | —     | —     |
| 21 | Perfluorohexane sulfonate   | PFHxS        | 7.95           | 398.9               | 80.0              | 98.9  | 119.0 |
| 22 | omega/alpha-Muricholic acid | w/a-MCA      | 7.97           | 407.2               | 371.2             | —     | —     |
| 23 | beta-Muricholic acid        | b-MCA        | 8.12           | 407.2               | 371.2             | —     | —     |
| 24 | Perfluorooctanoic acid      | PFOA         | 8.89           | 413.0               | 169.0             | 219.0 | 369.0 |
| 25 | Hyochoolic acid             | HCA          | 9.11           | 407.1               | 389.2             | —     | —     |

|                    |                                   |              |       |       |       |       |     |
|--------------------|-----------------------------------|--------------|-------|-------|-------|-------|-----|
| 26                 | Ursodeoxycholic acid              | UDCA         | 9.25  | 391.1 | 391.1 | -     | -   |
| 27                 | Taurochenodeoxycholic acid        | TCDCa        | 9.26  | 498.2 | 80.0  | 106.9 | 123 |
| 28                 | Glycochenodeoxycholic acid        | GCDCA        | 9.31  | 448.2 | 74.0  | -     | -   |
| 29                 | Taurodeoxycholic acid             | TDCA         | 9.63  | 498.2 | 80.0  | 106.9 | 123 |
| 30                 | Glycodeoxycholic acid             | GDCA         | 9.70  | 448.2 | 74.0  | -     | -   |
| 31                 | Hyodeoxycholic acid               | HDCA         | 9.72  | 391.1 | 391.1 | -     | -   |
| 32                 | Cholic acid                       | CA           | 9.74  | 407.2 | 343.2 | -     | -   |
| 33                 | 12-oxo-lithocholic acid           | 12-oxo-LCA   | 9.84  | 389.1 | 389.1 | -     | -   |
| 34                 | Perfluorononanoic acid            | PFNA         | 10.04 | 463.0 | 219.0 | 419.0 | -   |
| 35                 | Linear-perfluorooctane sulfonate  | L-PFOS       | 10.27 | 499.0 | 80.0  | 99.0  | 169 |
| 36                 | Taurolithocholic acid             | TLCA         | 10.87 | 482.2 | 80.0  | 106.9 | 123 |
| 37                 | Glycolithocholic acid             | GLCA         | 10.96 | 432.2 | 73.9  | -     | -   |
| 38                 | Chenodeoxycholic acid             | CDCA         | 11.54 | 391.1 | 391.1 | -     | -   |
| 39                 | Deoxycholic acid                  | DCA          | 11.78 | 391.1 | 391.1 | -     | -   |
| 40                 | Perfluorodecanoic acid            | PFDA         | 11.04 | 513.0 | 219.0 | 469.0 | -   |
| 41                 | Perfluoroundecanoic acid          | PFUnDA       | 11.92 | 563.0 | 269.0 | 519.0 | -   |
| 42                 | Perfluorodecane sulfonate         | PFDS         | 12.05 | 599.0 | 80.0  | 98.9  | -   |
| 43                 | Perfluorododecanoic acid          | PFDoDA       | 12.70 | 613.0 | 169.0 | 569.0 | -   |
| 44                 | Lithocholic acid                  | LCA          | 13.28 | 375.1 | 375.1 | -     | -   |
| 45                 | Perfluorotridecanoic acid         | PFTTrDA      | 13.39 | 662.9 | 169.0 | 619.0 | -   |
| Internal standards |                                   |              |       |       |       |       |     |
| 46                 | [13C4]- Perfluoropentanoic acid   | 13C4-PFPeA   | 3.68  | 266.0 | 222.0 | -     | -   |
| 47                 | [13C3]- Perfluoropentanoic acid   | 13C3-PFBS    | 4.51  | 301.9 | 98.9  | -     | -   |
| 48                 | [13C2]- Perfluorohexanoic acid    | 13C2-PFHxA   | 5.82  | 315.0 | 270.0 | -     | -   |
| 49                 | [D4]- Glycoursodeoxycholic acid   | D4-GUDCA     | 7.09  | 452.2 | 74.0  | -     | -   |
| 50                 | [13C4]- perfluoroheptanoic acid   | 13C4-PFHpA   | 7.53  | 367.0 | 322.0 | -     | -   |
| 51                 | [D4]- Taurocholic acid            | D4-TCA       | 7.82  | 518.2 | 123.9 | -     | -   |
| 52                 | [D4]- Glycocholic acid            | D4-GCA       | 7.83  | 468.2 | 74.0  | -     | -   |
| 53                 | [18O3]- perfluorohexane sulfonate | 13O3-NaPFHxS | 7.95  | 402.9 | 102.9 | -     | -   |

|                       |                                   |              |       |       |       |   |   |
|-----------------------|-----------------------------------|--------------|-------|-------|-------|---|---|
| 54                    | [13C4]- perfluorooctanoic acid    | 13C4-PFOA    | 8.89  | 417.0 | 372.0 | - | - |
| 55                    | [D4]- Ursodeoxycholic acid        | D4-UDCA      | 9.24  | 395.1 | 395.1 | - | - |
| 56                    | [D4]- Glycochenodeoxycholic acid  | D4-GCDCA     | 9.30  | 452.2 | 74.0  | - | - |
| 57                    | [D4]- Cholic acid                 | D4-CA        | 9.74  | 411.2 | 347.2 | - | - |
| 58                    | [13C5]- perfluorononanoic acid    | 13C5-PFNA    | 10.04 | 468.0 | 423.0 | - | - |
| 59                    | [13C4]- perfluorooctane sulfonate | 13C4-NaPFOS  | 10.27 | 503.0 | 99.0  | - | - |
| 60                    | [D4]- Glycolitocholic acid        | D4-GLCA      | 10.96 | 436.2 | 73.9  | - | - |
| 61                    | [13C2]- perfluorodecanoic acid    | 13C2-PFDA    | 11.04 | 515.0 | 470.0 | - | - |
| 62                    | [D4]- Chenodeoxycholic acid       | D4-CDCA      | 11.53 | 395.1 | 395.1 | - | - |
| 63                    | [D4]- Deoxycholic acid            | D4-DCA       | 11.78 | 395.1 | 395.1 | - | - |
| 64                    | [13C2]- perfluoroundecanoic acid  | 13C2-PFUnDA  | 11.92 | 565.0 | 520.0 | - | - |
| 65                    | [13C2]- perfluorododecanoic acid  | 13C2-PFDoDA  | 12.70 | 615.0 | 570.0 | - | - |
| 66                    | [D4]- Litocholic acid             | D4-LCA       | 13.26 | 379.1 | 379.1 | - | - |
| Performance standards |                                   |              |       |       |       |   |   |
| 67                    | [13C5]- perfluoropentanoic acid   | 13C5-PFPeA   | 3.68  | 268.0 | 223.0 | - | - |
| 68                    | [13C5]- perfluorohexanoic acid    | 13C5-PFHxA   | 5.81  | 318.0 | 273.0 | - | - |
| 69                    | [13C4]- perfluorohexane sulfonate | 13C4-NaPFHxS | 7.95  | 401.9 | 98.9  | - | - |
| 70                    | [13C8]- perfluorooctanoic acid    | 13C8-PFOA    | 8.89  | 421.0 | 376.0 | - | - |
| 71                    | [13C9]- perfluorononanoic acid    | 13C6-PFNA    | 10.04 | 472.0 | 427.0 | - | - |
| 72                    | [13C8]- perfluorooctane sulfonate | 13C8-NaPFOS  | 10.27 | 507.0 | 99.0  | - | - |
| 73                    | [13C6]- perfluorodecanoic acid    | 13C6-PFDA    | 11.04 | 519.0 | 474.0 | - | - |
| 74                    | [13C7]- perfluoroundecanoic acid  | 13C7-PFUnDA  | 11.92 | 570.0 | 525.0 | - | - |

**Table S3** Recovery mean, recovery range and RSD of the internal standards in the NIST SRM 1957 and QC plasma samples

| Internal standards (PFAS) | NIST SRM 1957 (n=4) |                    |      | QC plasma (n=7) |                    |      |
|---------------------------|---------------------|--------------------|------|-----------------|--------------------|------|
|                           | Mean (%)            | Recovery range (%) | RSD  | Mean (%)        | Recovery range (%) | RSD  |
| <sup>13</sup> C-PFHPeA    | 119                 | 99.6-120           | 13.7 | 111             | 94.6-127           | 9.93 |
| <sup>13</sup> C-PFHxA     | 111                 | 94.9-116           | 8.15 | 106             | 93.3-122           | 6.67 |
| <sup>13</sup> C-PFHpA     | 118                 | 101-116            | 6.28 | 109             | 81.9-131           | 13.3 |
| <sup>13</sup> C-PFHxS     | 110                 | 89.5-119           | 11.6 | 104             | 92.3-124           | 7.55 |
| <sup>13</sup> C-PFOA      | 110                 | 93.0-115           | 8.74 | 106             | 93.0-121           | 8.42 |
| <sup>13</sup> C-PFNA      | 114                 | 92.4-114           | 9.28 | 106             | 91.5-127           | 7.97 |
| <sup>13</sup> C-L-PFOS    | 116                 | 87.0-116           | 14.3 | 107             | 90.7-128           | 7.76 |
| <sup>13</sup> C-PFDA      | 117                 | 81.5-117           | 14.7 | 102             | 88.8-132           | 9.53 |
| <sup>13</sup> C-PFUnDA    | 119                 | 61.4-117           | 25.9 | 90.6            | 87.2-138           | 12.1 |

**Table S4** Recovery mean, recovery range and RSD of the bile acids in NIST SRM 1957 and QC plasma samples

| Internal standards (BA) | NIST SRM 1957 (n=4) |                    |     | QC plasma (n=7) |                    |     |
|-------------------------|---------------------|--------------------|-----|-----------------|--------------------|-----|
|                         | Mean (%)            | Recovery range (%) | RSD | Mean (%)        | Recovery range (%) | RSD |
| D4-CA                   | 63.9                | 53.7-83            | 21% | 48.0            | 37.2-83.1          | 30% |
| D4-GCA                  | 52.0                | 41.4-67.2          | 21% | 55.7            | 48.8-72.9          | 13% |
| D4-GUDCA                | 70.3                | 60.2-89.4          | 19% | 70.9            | 62.2-90.8          | 13% |
| D4-GCDCA                | 48.5                | 40-61.6            | 19% | 53.4            | 46.3-77.5          | 19% |
| D4-UDCA                 | 100.0               | 88.5-122.8         | 16% | 75.2            | 69.8-82.6          | 6%  |
| D4-CDCA                 | 104.9               | 87.9-136.1         | 21% | 59.3            | 50.5-70.5          | 11% |
| D4-DCA                  | 81.9                | 69.2-101.9         | 17% | 52.9            | 45-65              | 13% |
| D4-GLCA                 | 40.2                | 35.7-48            | 14% | 46.6            | 39-68              | 20% |
| D4-LCA                  | 81.1                | 67-89.1            | 12% | 74.8            | 68-90.3            | 11% |

<sup>1</sup>also applied for HCA

<sup>2</sup>also applied for GHCA

**Table S5** Linear range, limits of detection, average concentration and RSD of the PFAS and BA in QC plasma samples (n= 10) using 20 µl sample volume

| Analyte    | r      | LLOQ   | ULOQ | Average concentration | %RSD  |
|------------|--------|--------|------|-----------------------|-------|
| TDHCA      | 0.9989 | 0.0025 | 300  | 2.07                  | 32.06 |
| TaMCA      | 0.9982 | 0.5    | 300  | 12.91                 | 6.5   |
| TwMCA      | 0.9982 | 1      | 600  |                       |       |
| TbMCA      | 0.9966 | 0.25   | 600  | 16.76                 | 7.98  |
| GDHCA      | 0.9991 | 0.25   | 600  | nd                    | n/a   |
| THCA       | 0.9985 | 0.25   | 600  | 25.22                 | 4.52  |
| TUDCA      | 0.9989 | 0.25   | 600  | 19.74                 | 3.72  |
| 7-OXO-DCA  | 0.999  | 0.025  | 600  | 2.85                  | 43.2  |
| 7-OXO-HDCA | 0.9986 | 0.25   | 600  | nd                    | n/a   |
| aMCA       | 0.9968 | 0.5    | 600  | nd                    | n/a   |
| bMCA       | 0.9948 | 1      | 600  | nd                    | n/a   |
| CA         | 0.9959 | 0.25   | 600  | 30.62                 | 7.23  |
| CDCA       | 0.9992 | 1      | 600  | 49.23                 | 5.09  |
| DCA        | 0.9991 | 0.025  | 600  | 16.55                 | 10.51 |
| DHCA       | 0.9897 | 0.5    | 600  | nd                    | n/a   |
| GCA        | 0.9992 | 0.0025 | 600  | 317.9                 | 2.49  |
| GCDCA      | 0.9991 | 0.0025 | 600  | 1004.2                | 2.02  |
| GDCA       | n/a    | n/a    | n/a  |                       |       |
| GHCA       | 0.9986 | 0.025  | 600  | 34.31                 | 8.45  |
| GHDCA      | 0.9986 | 0.0025 | 600  | 86.57                 | 4.15  |
| GLCA       | 0.9998 | 0.0025 | 600  | 3.56                  | 31.3  |
| GUDCA      | 0.9984 | 0.0025 | 600  | 88.36                 | 3.46  |
| HCA        | 0.9973 | 0.25   | 300  | 11.31                 | 10.77 |
| HDCA       | 0.9987 | 0.5    | 600  | nd                    | n/a   |
| LCA        | 0.9989 | 0.5    | 300  | nd                    | n/a   |
| TCA        | 0.9985 | 1      | 600  | 97.97                 | 3.63  |
| TCDCA      | 0.9997 | 0.0025 | 600  | 380.3                 | 3.55  |
| TDCA       | 0.9996 | 0.25   | 600  | 12.2                  | 4.96  |
| THDCA      | 0.9981 | 0.25   | 600  | 14.49                 | 6.8   |
| TLCA       | 0.993  | 0.25   | 600  | nd                    | n/a   |
| UDCA       | 0.9993 | 0.25   | 600  | 28.52                 | 3.71  |
| wMCA       | 0.98   | 10     | 600  | nd                    | n/a   |
| 12-OXO-LCA | 0.9982 | 10     | 600  | nd                    | n/a   |
| PFBuS      | 0.9987 | 0.025  | 200  | nd                    | n/a   |
| PFDA       | 0.53   | n/a    | n/a  | n/a                   | n/a   |
| PFDoDA     | 0.9995 | 0.5    | 200  | nd                    | n/a   |
| PFDS       | 0.9978 | 0.5    | 200  | nd                    | n/a   |

|         |        |       |     |      |      |
|---------|--------|-------|-----|------|------|
| PFHpA   | 0.9996 | 0.025 | 200 | nd   | n/a  |
| PFHxA   | 0.995  | 0.025 | 200 | nd   | n/a  |
| PFHxS   | 0.9985 | 0.25  | 200 | nd   | n/a  |
| PFNA    | 0.9993 | 0.025 | 200 | nd   | n/a  |
| PFOA    | 0.999  | 0.25  | 200 | n/a* | n/a  |
| PFOS    | 0.9993 | 0.025 | 200 | 0.53 | 3.04 |
| PFOSA   | 0.9997 | 0.5   | 200 | 0.07 | 7.4  |
| PFPeA   | 0.9975 | 0.025 | 100 | nd   | n/a  |
| PFTTrDA | 0.9975 | 0.5   | 200 | 1.57 | 0.92 |
| PFUnDA  | 0.9991 | 10    | 200 | nd   | n/a  |

\*High background level in the blanks

**Fig. S1** Some BAs such as TCDCA and TDCA as well as TUDCA and THDCA undergoes the same transition ( $499 > 80$  m/z) and also readily to co-elute with L-PFOS. Chromatographic separation and multiple product ions were selected to reduce potential interferences of selected BAs with L-PFOS

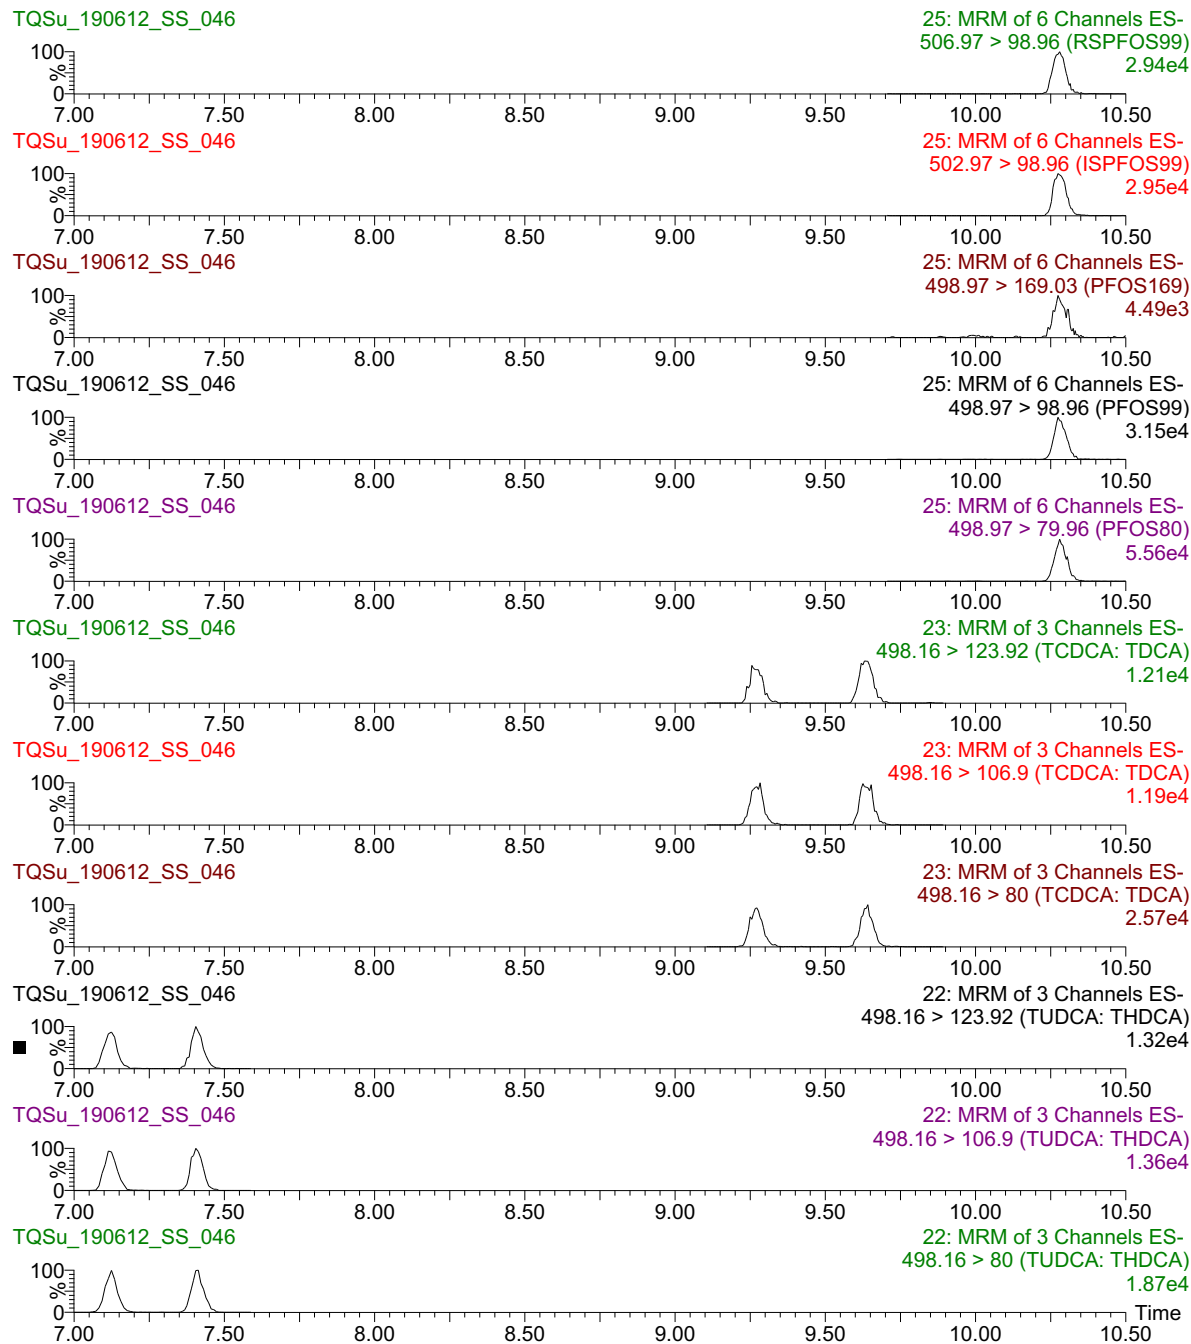

**Fig. S2** Matrix suppression for (A) d4-GLCA, (B) d4-GCA and (C) d4-GUDCA, with ISTD added before (upper panels) and after sample clean-up (lower panels) and the deviation between the peak areas

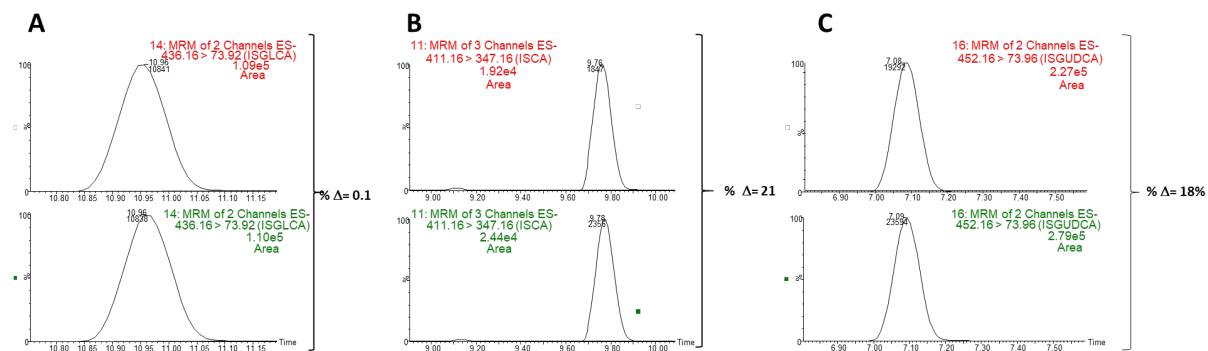

**Fig. S3** Boxplots of the measured concentrations of the PFAS and bile acids in the healthy human subjects

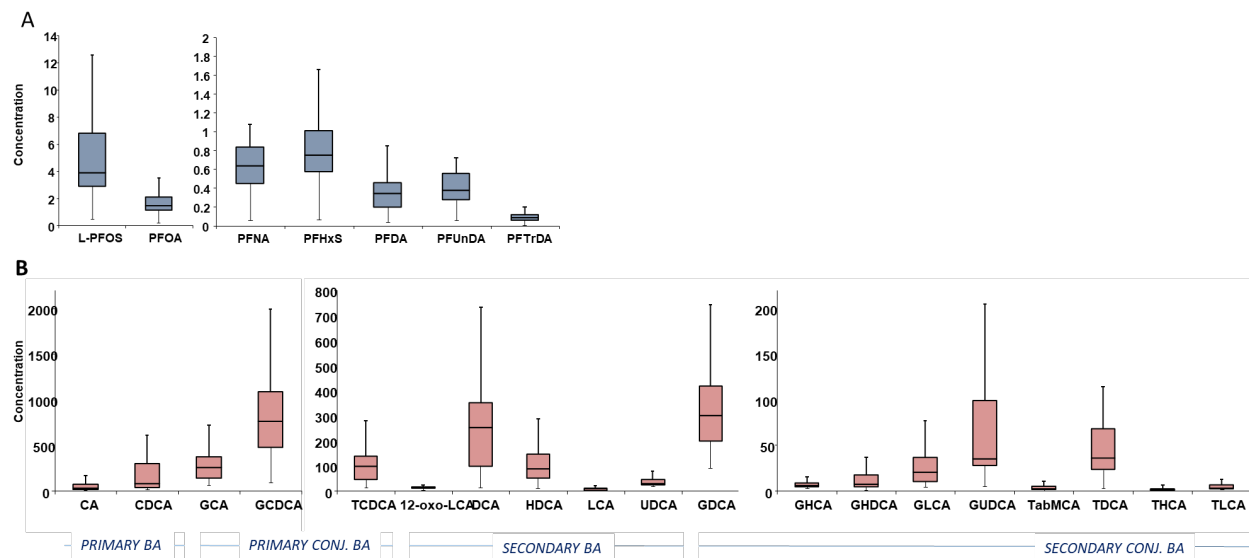

Supplement: MOESM1 [file 216_2019_2263_MOESM1_ESM.pdf]
